# Supplementary material
Source: Royal Society of Chemistry journal article supplement (doi:10.1039/d6ee00528d)
Supplement: d6ee00528d8.pdf [file d6ee00528d8.pdf]

## Supplementary Information

### **Synergistic boosting electrical output of moisture-electric generator based on CCNF-LiCl-PAM hydrogel**

Xinpeng Zhang,<sup>ab</sup> Jiaxuan Liu,<sup>b</sup> Xinyuan Qu,<sup>b</sup> Ao Shen,<sup>b</sup> and Xin Wang <sup>\*abc</sup>

<sup>a</sup>School of Materials and Chemistry, Anhui Agricultural University, Hefei 230036, P. R. China.

<sup>b</sup>Henan Key Laboratory of Quantum Materials and Quantum Energy, School of Future Technology, Henan University, Kaifeng 475004, China.

<sup>c</sup>Anhui Provincial Engineering Center for High-Performance Biobased Nylon, Anhui Agricultural University, Hefei 230036, P. R. China

E-mail: [xwang06@ahau.edu.cn](mailto:xwang06@ahau.edu.cn) and [xwang2008@vip.henu.edu.cn](mailto:xwang2008@vip.henu.edu.cn)

**Fig. S1.** Schematic illustration of preparation process of the CLP hydrogel.

**Fig. S2.** Conductivities of the CLP hydrogels with different LiCl concentrations.

**Fig. S3.** XRD patterns of CCNF-PAM and CCNF-LiCl-PAM (CLP) Hydrogels.

**Fig. S4.** EDS mapping of C, N, O, Li and Cl elements in the CLP hydrogel.

**Fig. S5.** (a) Conductivity of the CLP hydrogel and (b) electrical outputs of the CLP-MEG based on the CLP hydrogel prepared by different BIS contents.

**Fig. S6.** Surface potentials of MEGs with different salts were simulated using COMSOL software.

**Fig. S7.** Output voltages of the CLP-MEGs with different areas.

**Fig. S8.** CV curves of the CLP-MEG with different top electrodes (Zn, Al, Ag, and Cu).

**Fig. S9.** TG and DTG curves of the pristine CLP hydrogel and the CLP hydrogel after 90 days.

**Fig. S10.** SEM images of the pristine Zn electrode (a-c) and the Zn electrode after 90 days (d-f).

**Fig. S11.** XRD patterns of the pristine Zn electrode and the Zn electrode after 90 days.

**Fig. S12.** XPS spectra of the Zn electrode before and after 90 days.

**Fig. S13.** EDS mapping of Zn element on top and bottom surfaces of the CLP hydrogel after 90 days.

**Fig. S14.** EDS mapping of Zn and Li elements on the LIG electrode after 90 days.

**Fig. S15.** Schematic illustration of fabrication process of the parallel-integrated MEGs.

**Fig. S16.** Schematic illustration of fabrication process of the series-integrated MEGs.

**Fig. S17.** Voltage output of 90 MEG units connected in parallel.

**Fig. S18.** Current output of 60 MEG units connected in series.

**Fig. S19.** Voltage curve of a 10  $\mu$ F commercial capacitor charged directly by 60 MEG units connected in series. The inset shows the corresponding circuit diagram.

**Fig. S20.** Output voltage (a) and current (b) of 12 MEG units connected in parallel.

**Fig. S21.** Photography of four hygro-thermographs in parallel directly powered by a single large-area CLP-MEG ( $5 \times 5$  cm<sup>2</sup>).

**Table S1.** EDS elemental composition on top surface of the CLP hydrogel after 90 days.

**Table S2.** EDS elemental composition on bottom surface of the CLP hydrogel after 90 days.

**Movie S1.** A calculator powered by a MEG unit.

**Movie S2.** A hygro-thermograph powered by a MEG unit.

**Movie S3.**  $3 \times 1.0$  W LED lamps powered by 60 MEG units connected in series.

**Movie S4.** Twelve hygro-thermographs in parallel powered by 12 MEG units connected in parallel.

**Movie S5.** One smartphone directly powered by a 1.0 F capacitor that is charged by the integrated  $3 \times 3$  MEGs.

**Movie S6.** An LED screen directly powered by a 1.0 F capacitor that is charged by the integrated  $3 \times 3$  MEGs.

**Movie S7.** Four hygro-thermographs in parallel directly powered by a single  $5 \times 5$  cm<sup>2</sup> CLP-MEG.

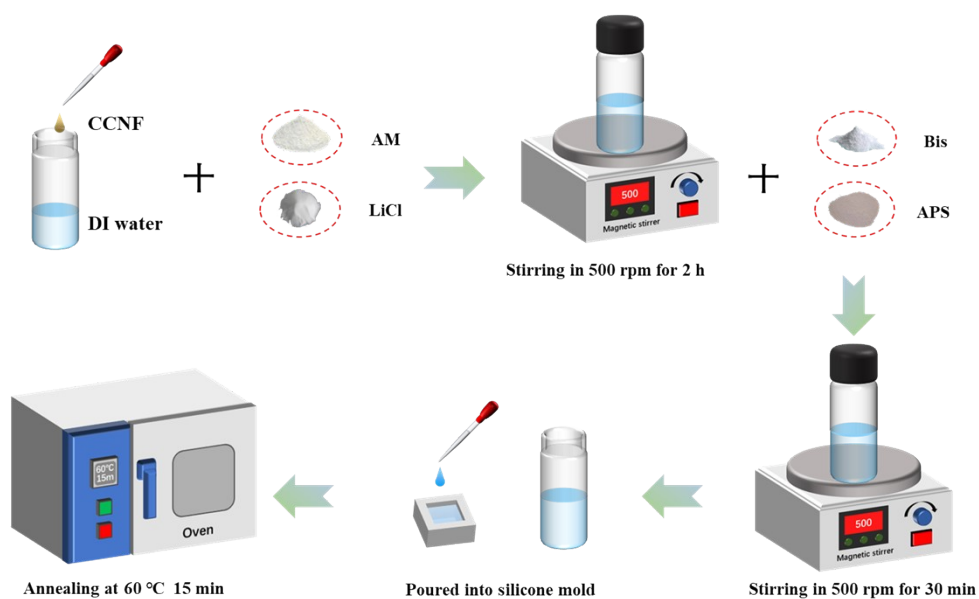

**Fig. S1.** Schematic illustration of preparation process of the CLP hydrogel.

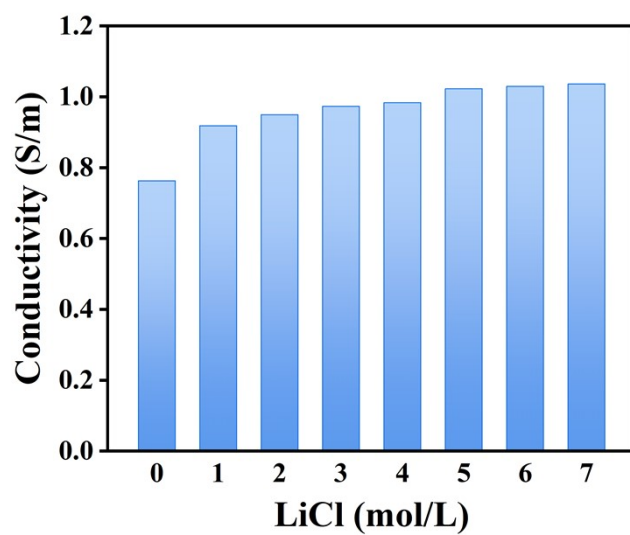

**Fig. S2.** Conductivities of the CLP hydrogels with different LiCl concentrations.

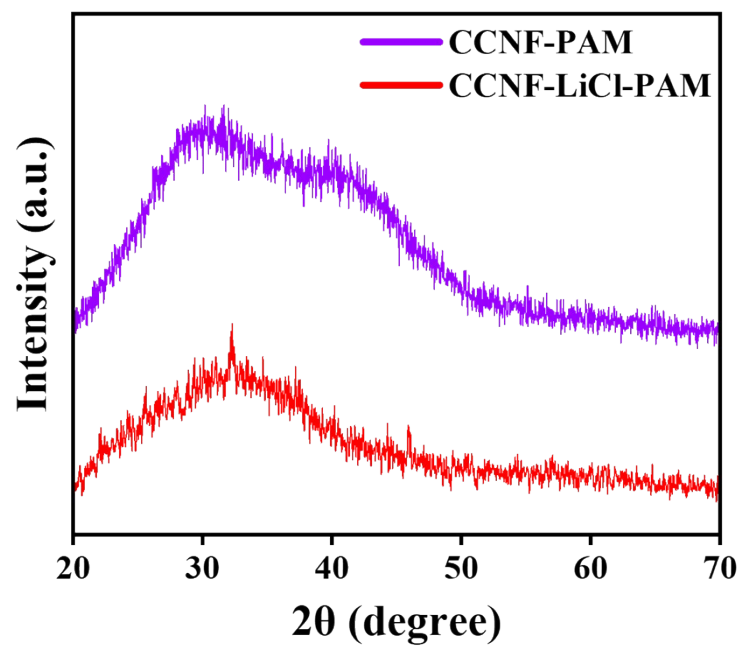

**Fig. S3.** XRD patterns of CCNF-PAM and CCNF-LiCl-PAM (CLP) Hydrogels.

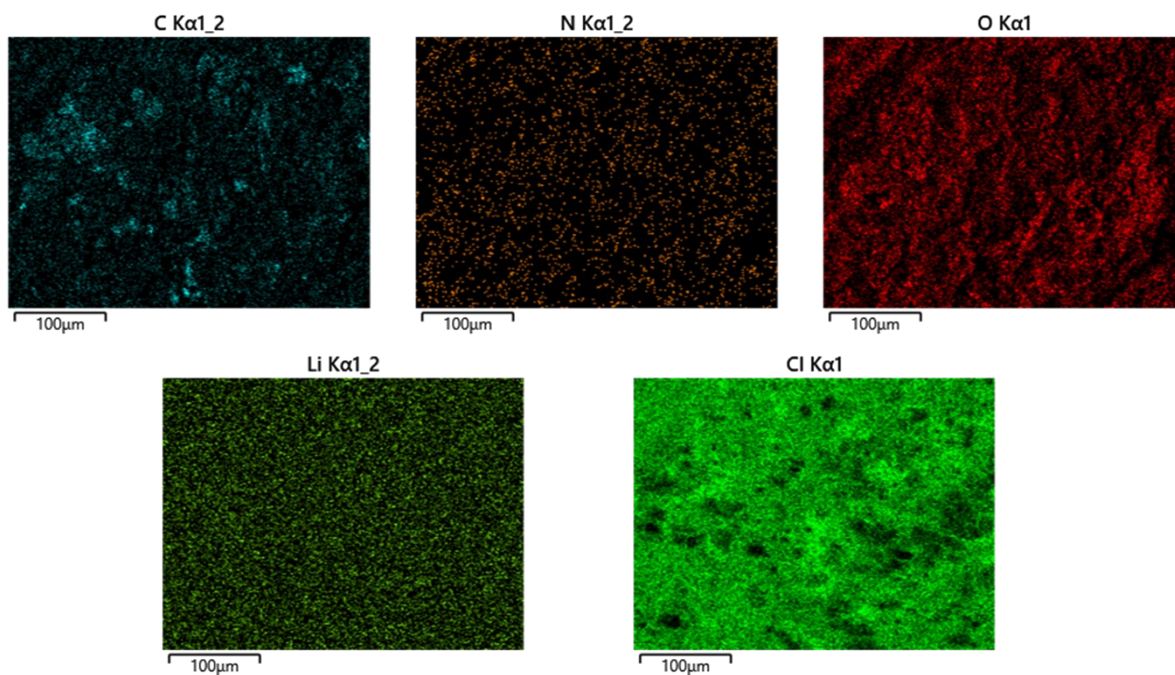

**Fig. S4.** EDS mapping of C, N, O, Li and Cl elements in the CLP hydrogel.

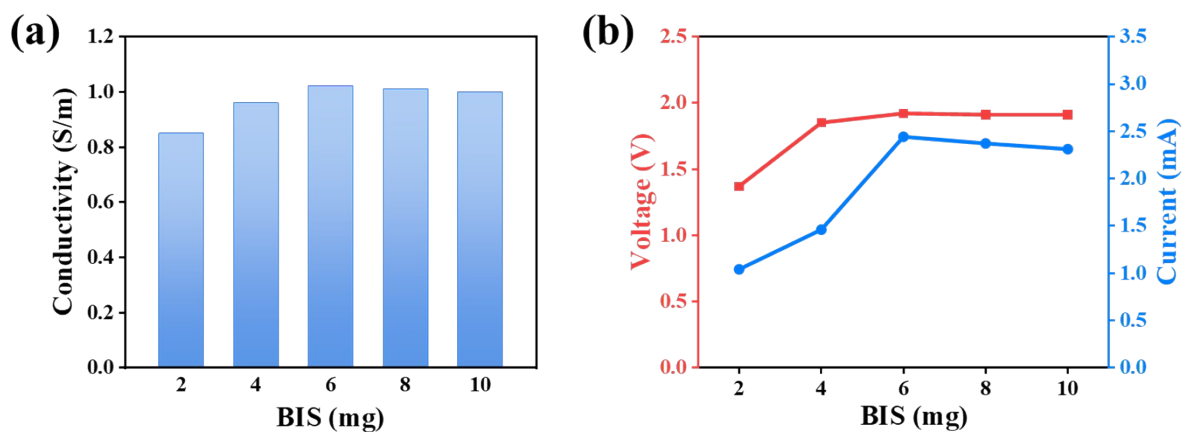

**Fig. S5.** (a) Conductivity of the CLP hydrogel and (b) electrical outputs of the CLP-MEG based on the CLP hydrogel prepared by different BIS contents.

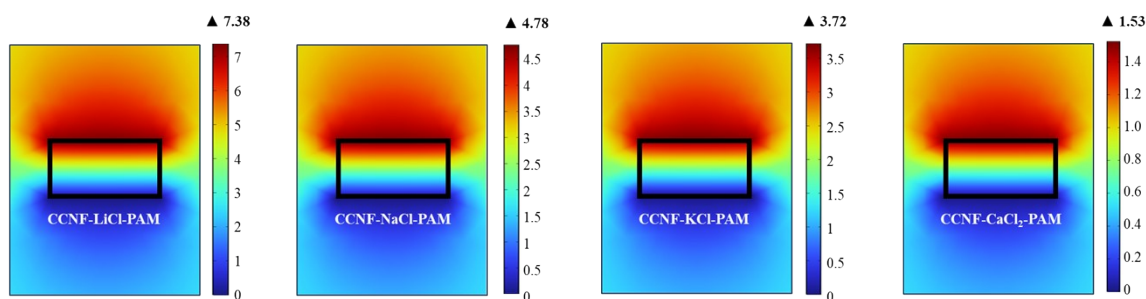

**Fig. S6.** Surface potentials of MEGs with different salts were simulated using COMSOL software. The highest and lowest surface potential belongs to the MEGs with monovalent Li<sup>+</sup> and divalent Ca<sup>2+</sup> ions, respectively. Under the same conditions, the greater difference in surface potential of the nanochannels, the faster the ions migration within the channels.

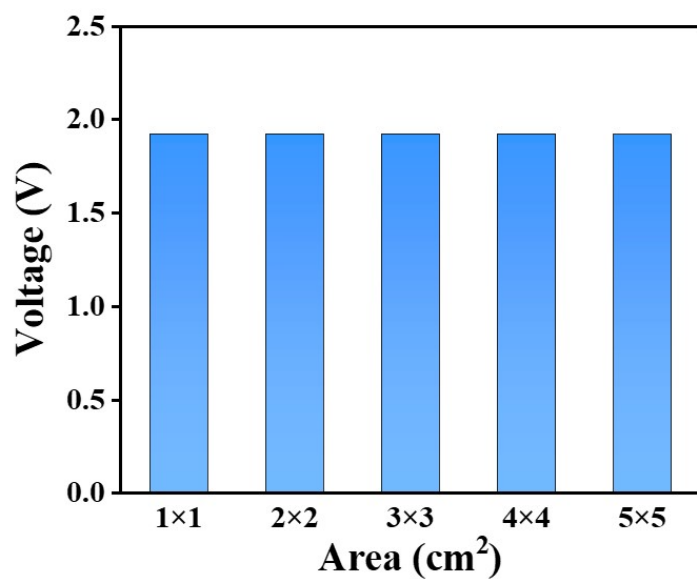

Fig. S7. Output voltages of the CLP-MEGs with different areas.

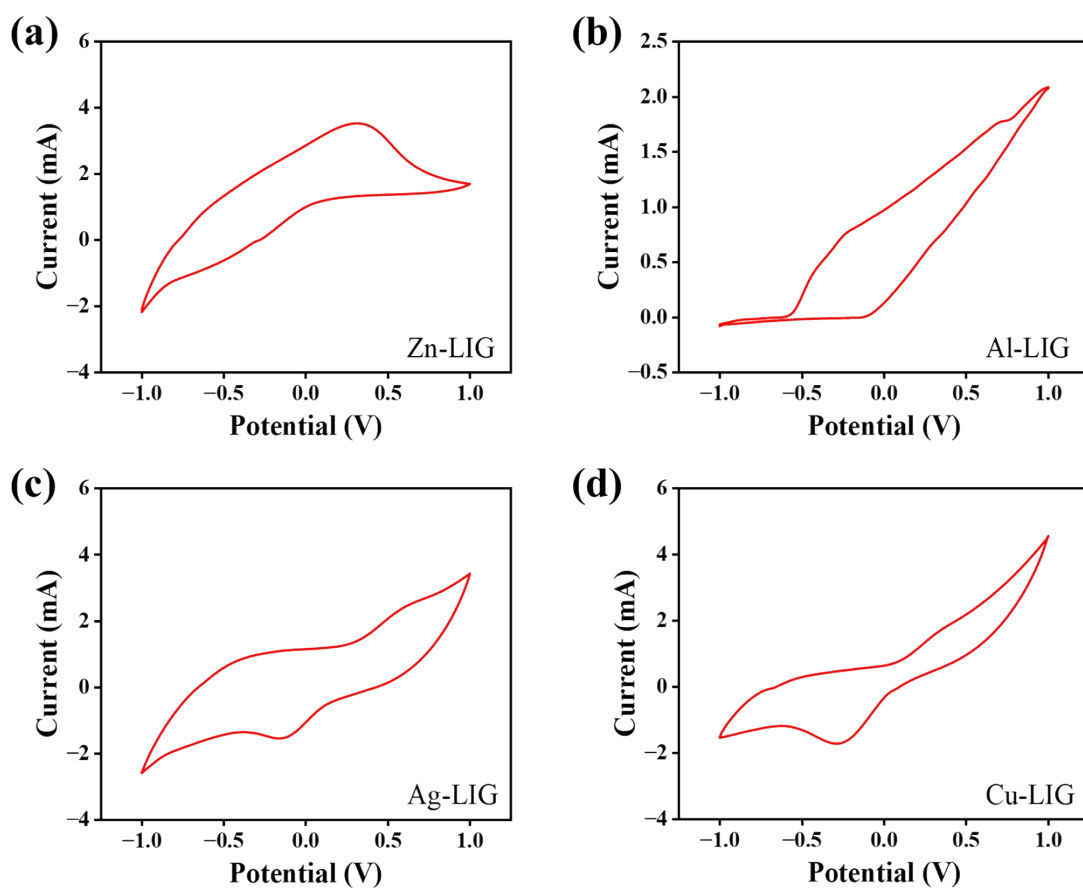

Fig. S8. CV curves of the CLP-MEG with different top electrodes (Zn, Al, Ag, and Cu).

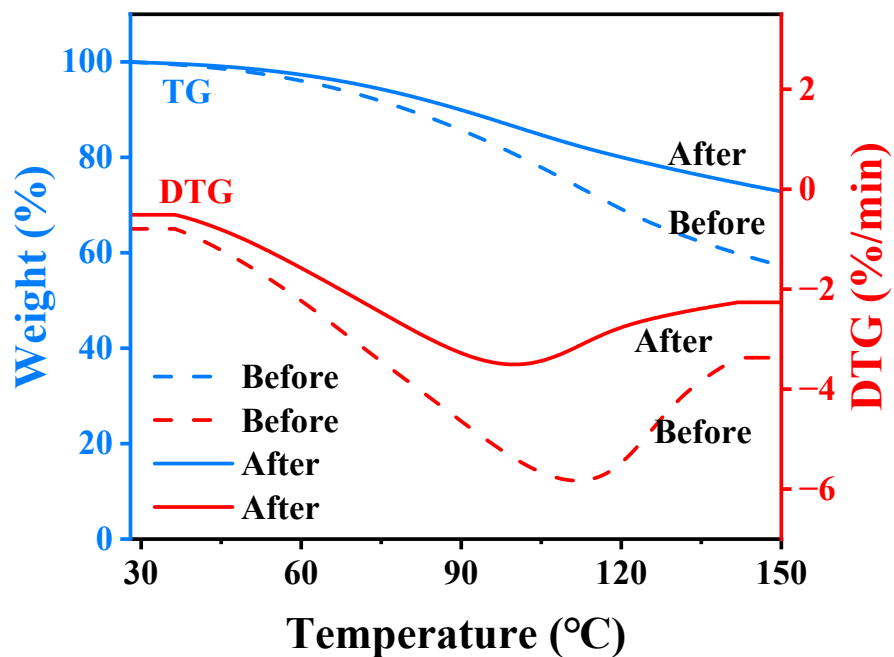

**Fig. S9.** TG and DTG curves of the pristine CLP hydrogel and the CLP hydrogel after 90 days.

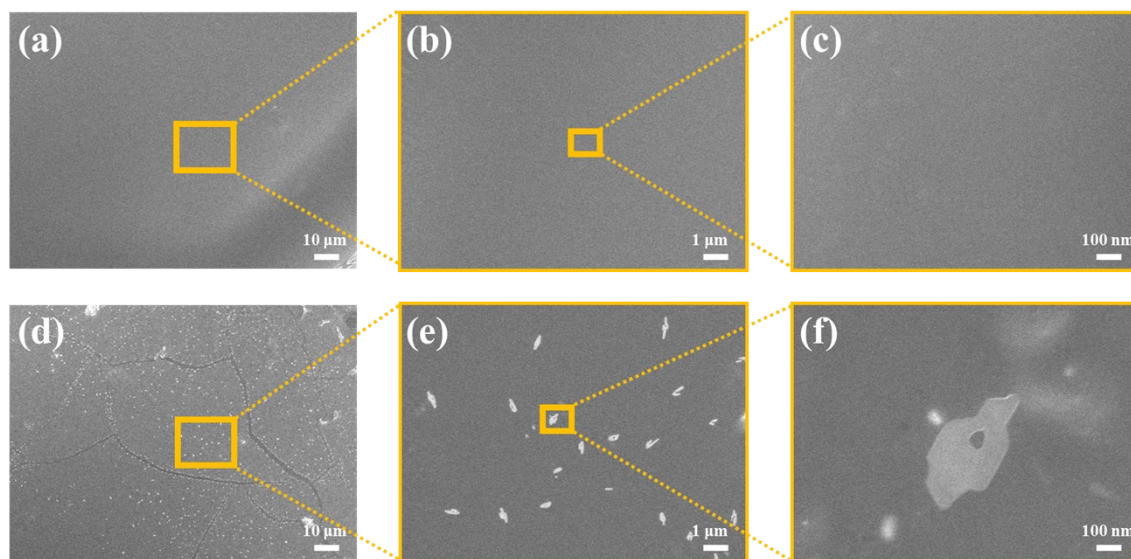

**Fig. S10.** SEM images of the pristine Zn electrode (a-c) and the Zn electrode after 90 days (d-f).

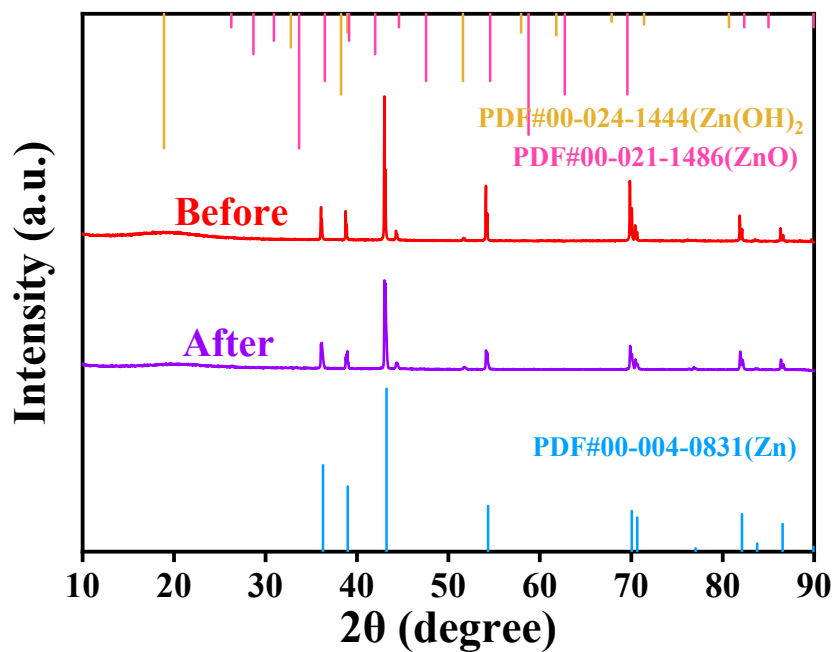

Fig. S11. XRD patterns of the pristine Zn electrode and the Zn electrode after 90 days.

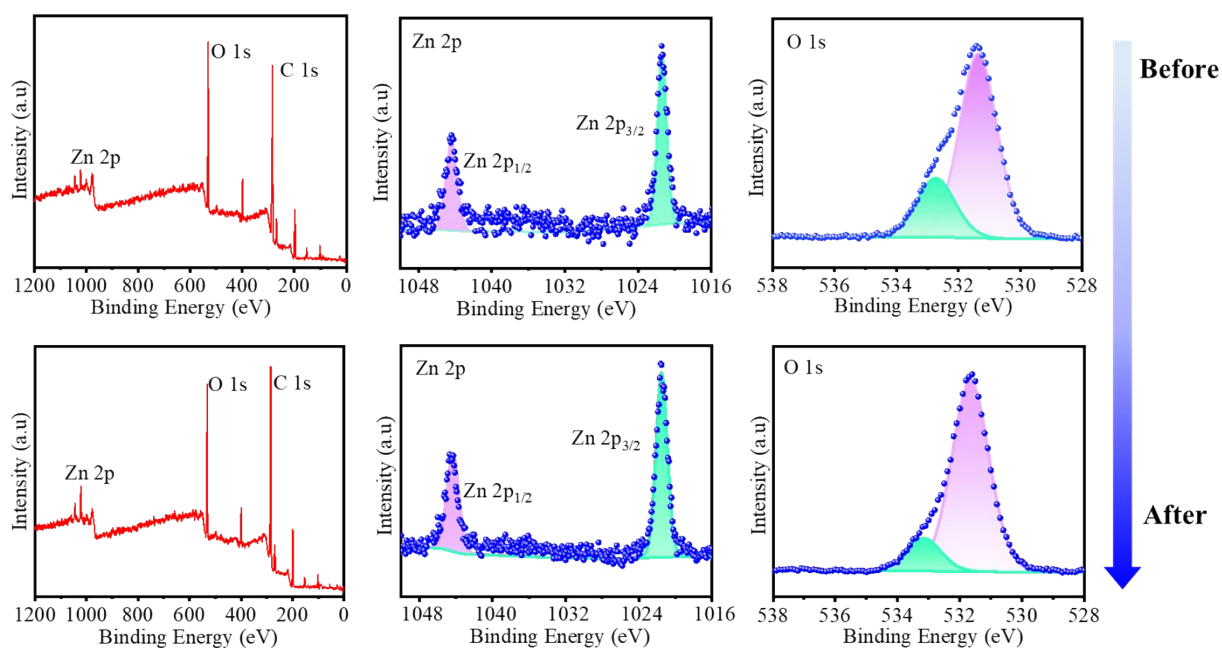

Fig. S12. XPS spectra of the Zn electrode before and after 90 days.

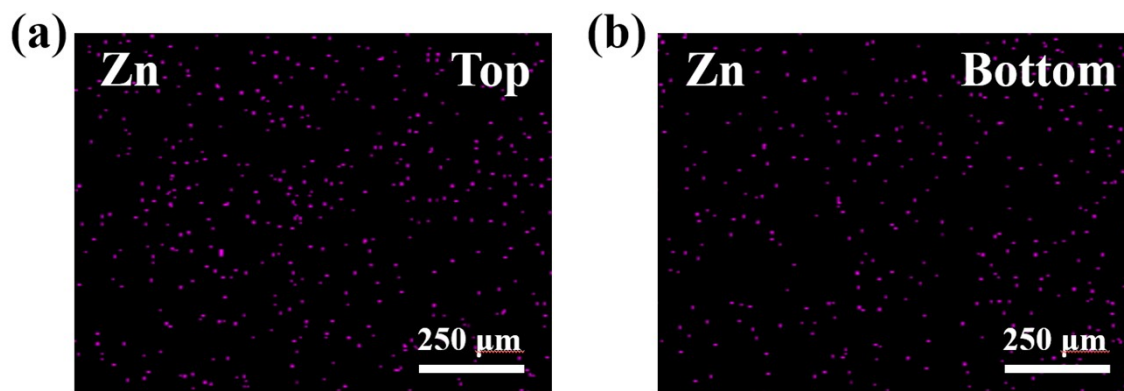

**Fig. S13.** EDS mapping of Zn element on top and bottom surfaces of the CLP hydrogel after 90 days.

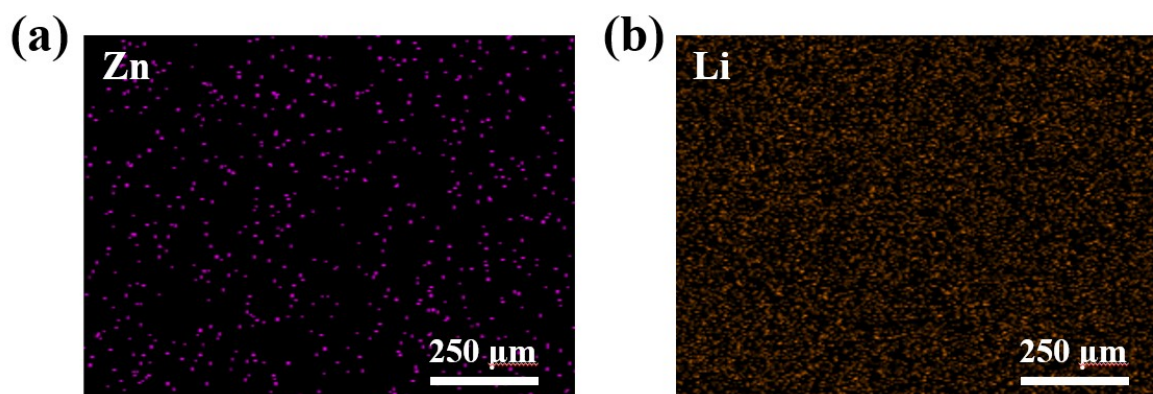

**Fig. S14.** EDS mapping of Zn and Li elements on the LIG electrode after 90 days.

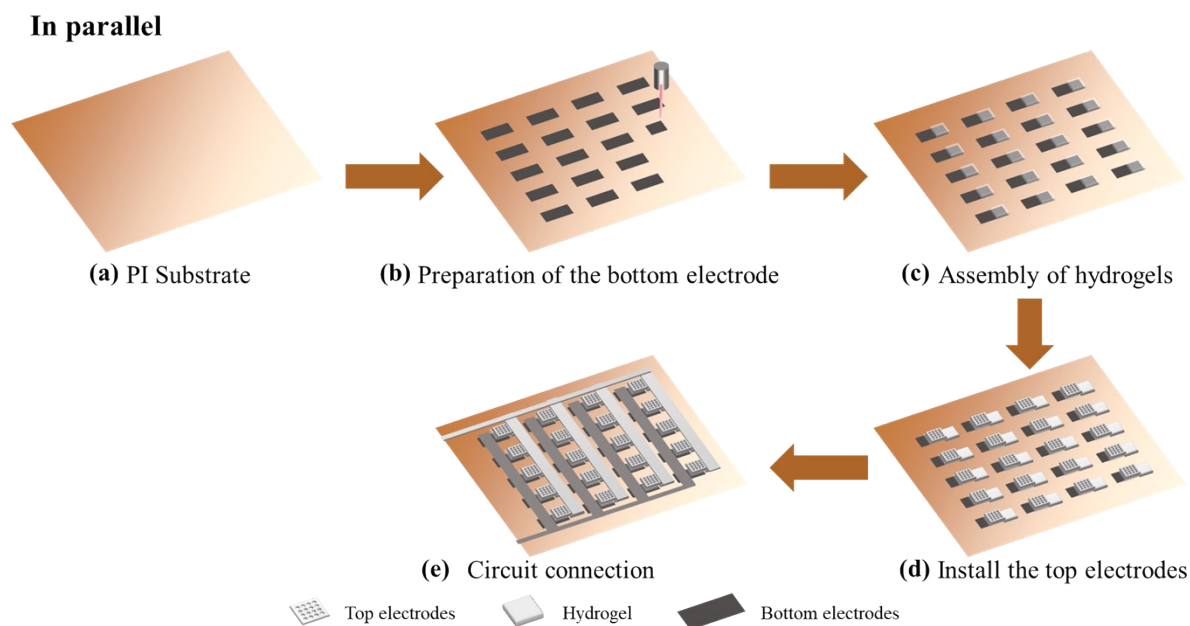

**Fig. S15.** Schematic illustration of fabrication process of the parallel-integrated MEGs. (a) PI substrate. (b) Fabrication of LIG electrodes on the PI substrate using a programmable laser engraving machine. (c) Assembly of the prepared hydrogel onto the bottom LIG electrode. (d) Assembly of top porous-Zn electrodes on the hydrogel surface. (e) The parallel-integrated MEGs are fabricated via end-to-end and head-to-head connections.

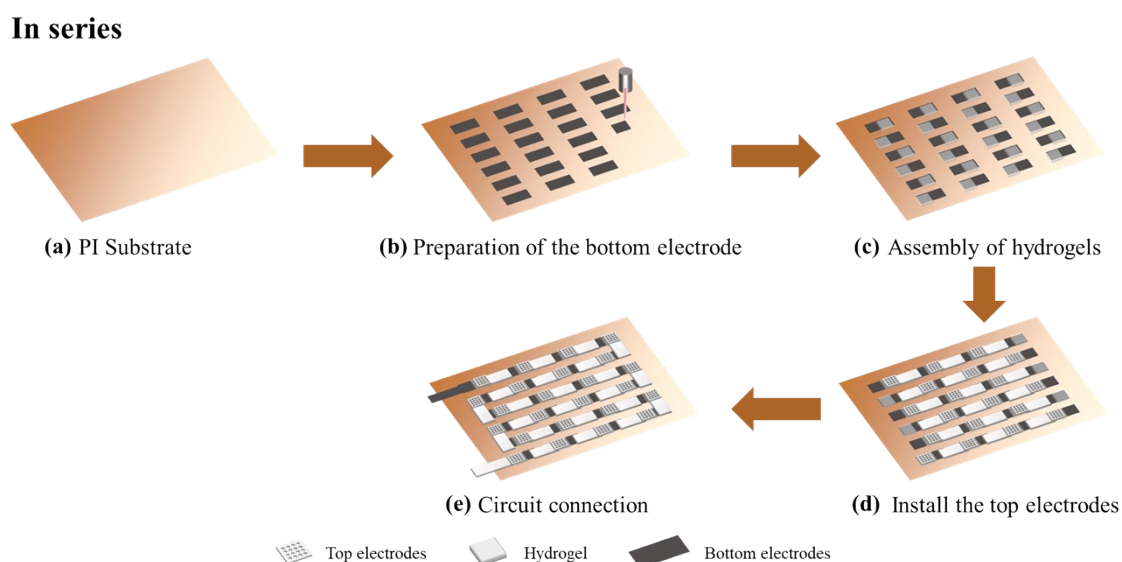

**Fig. S16.** Schematic illustration of fabrication process of the series-integrated MEGs. (a) PI substrate. (b) Fabrication of LIG electrodes on the PI substrate using a programmable laser engraving machine. (c) Assembly of the prepared hydrogel onto the bottom LIG electrode. (d) Assembly of top porous-Zn electrodes on the hydrogel surface. (e) The series-integrated MEGs are fabricated via head-to-end connections.

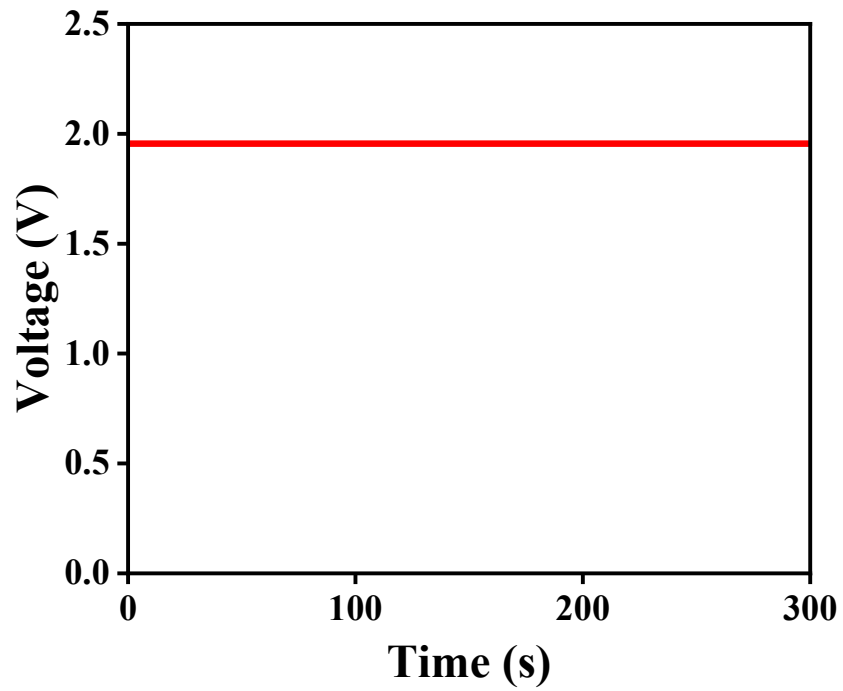

Fig. S17. Voltage output of 90 MEG units connected in parallel.

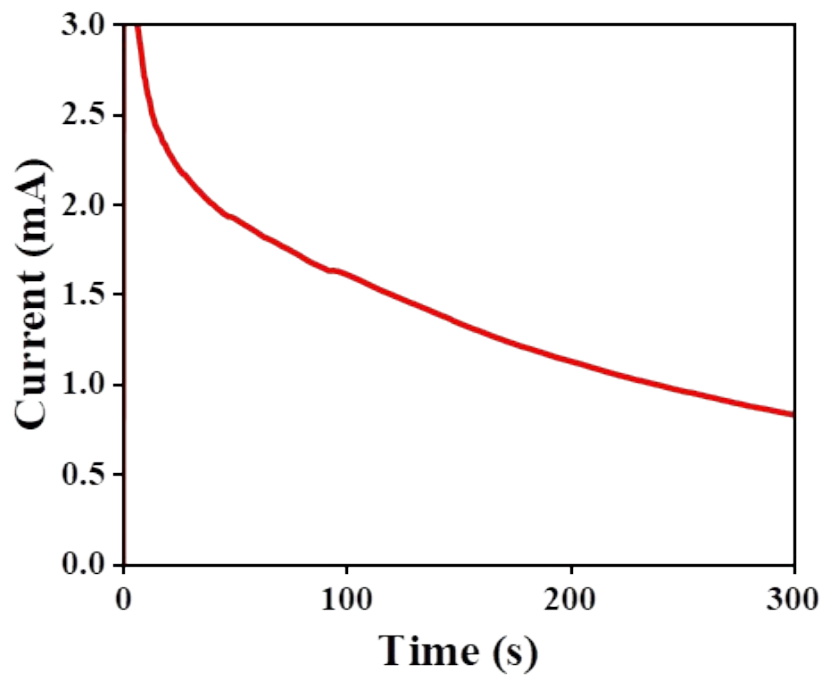

Fig. S18. Current output of 60 MEG units connected in series.

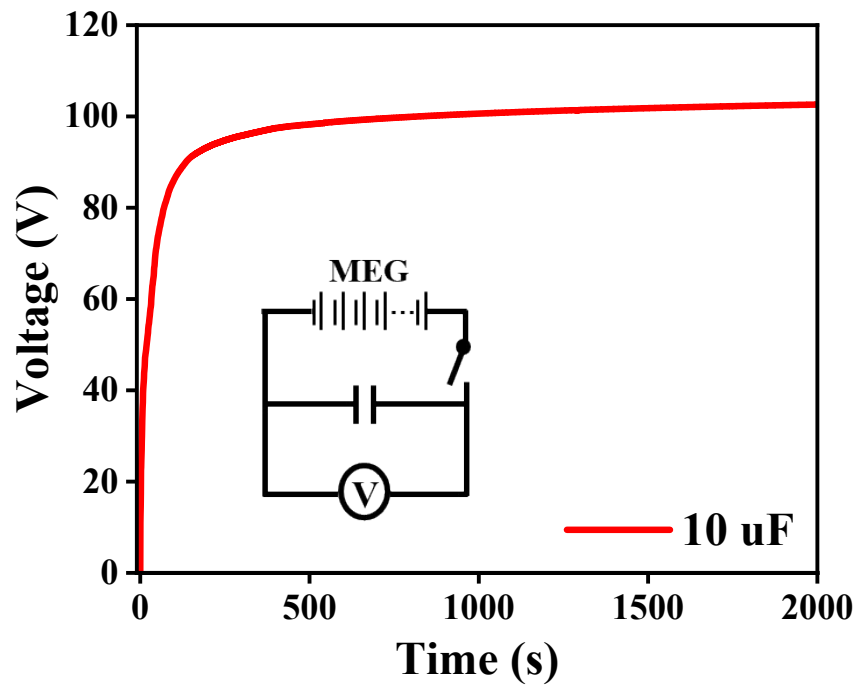

**Fig. S19.** Voltage curve of a 10  $\mu\text{F}$  commercial capacitor charged directly by 60 MEG units connected in series. The inset shows the corresponding circuit diagram.

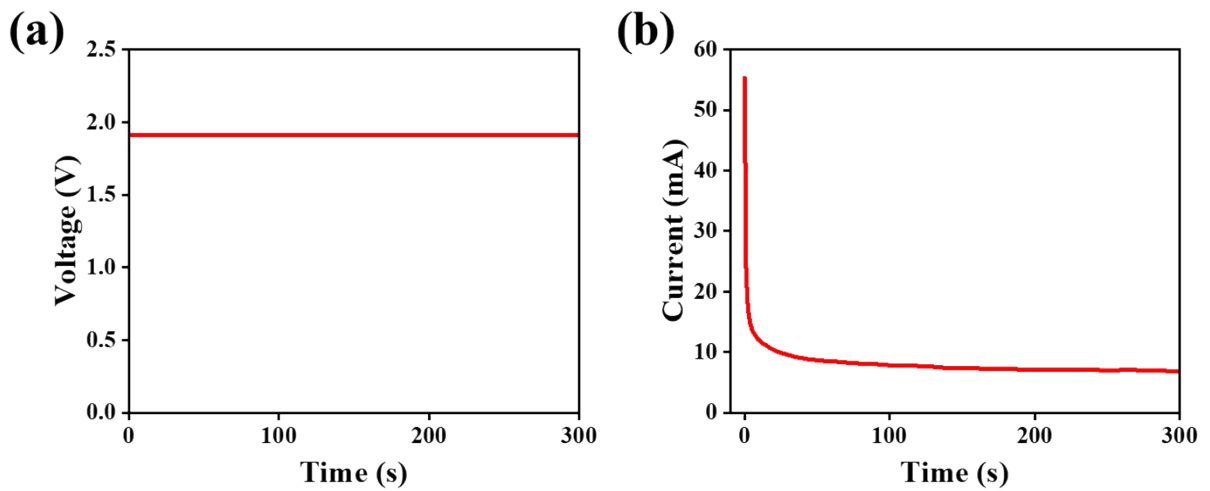

**Fig. S20.** Output voltage (a) and current (b) of 12 MEG units connected in parallel.

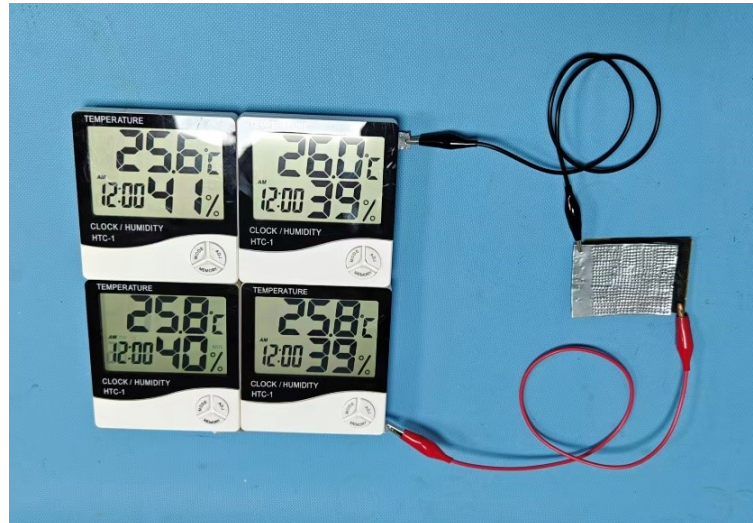

**Fig. S21.** Photography of four hygro-thermographs in parallel directly powered by a single large-area CLP-MEG ( $5 \times 5 \text{ cm}^2$ ).

**Table S1.** EDS elemental composition on top surface of the CLP hydrogel after 90 days.

| <b>Element</b> | <b>Line Type</b> | <b>Weight Percentage (%)</b> | <b>Wt % Sigma</b> | <b>Atomic Percentage (%)</b> |
|----------------|------------------|------------------------------|-------------------|------------------------------|
| C              | K series         | 48.47                        | 0.73              | 56.97                        |
| O              | K series         | 35.71                        | 0.61              | 31.51                        |
| Cl             | K series         | 6.81                         | 0.13              | 2.71                         |
| N              | K series         | 8.68                         | 1.01              | 8.74                         |
| Zn             | K series         | 0.34                         | 0.13              | 0.07                         |
| <b>Total</b>   |                  | <b>100.00</b>                |                   | <b>100.00</b>                |

**Table S2.** EDS elemental composition on bottom surface of the CLP hydrogel after 90 days.

| <b>Element</b> | <b>Line Type</b> | <b>Weight Percentage (%)</b> | <b>Wt % Sigma</b> | <b>Atomic Percentage (%)</b> |
|----------------|------------------|------------------------------|-------------------|------------------------------|
| C              | K series         | 47.81                        | 0.75              | 56.09                        |
| O              | K series         | 35.86                        | 0.64              | 31.58                        |
| Cl             | K series         | 6.61                         | 0.13              | 2.63                         |
| N              | K series         | 9.62                         | 1.06              | 9.68                         |
| Zn             | K series         | 0.09                         | 0.13              | 0.02                         |
| <b>Total</b>   |                  | <b>100.00</b>                |                   | <b>100.00</b>                |
